# Supplementary material for: The bHLH Transcription Factor PhbHLH121 Regulates Response to Iron Deficiency in Petunia hybrida
Source: MDPI journal article supplement (doi:10.3390/plants13233429), 2024-12-06
Supplement: s1 [file s1]

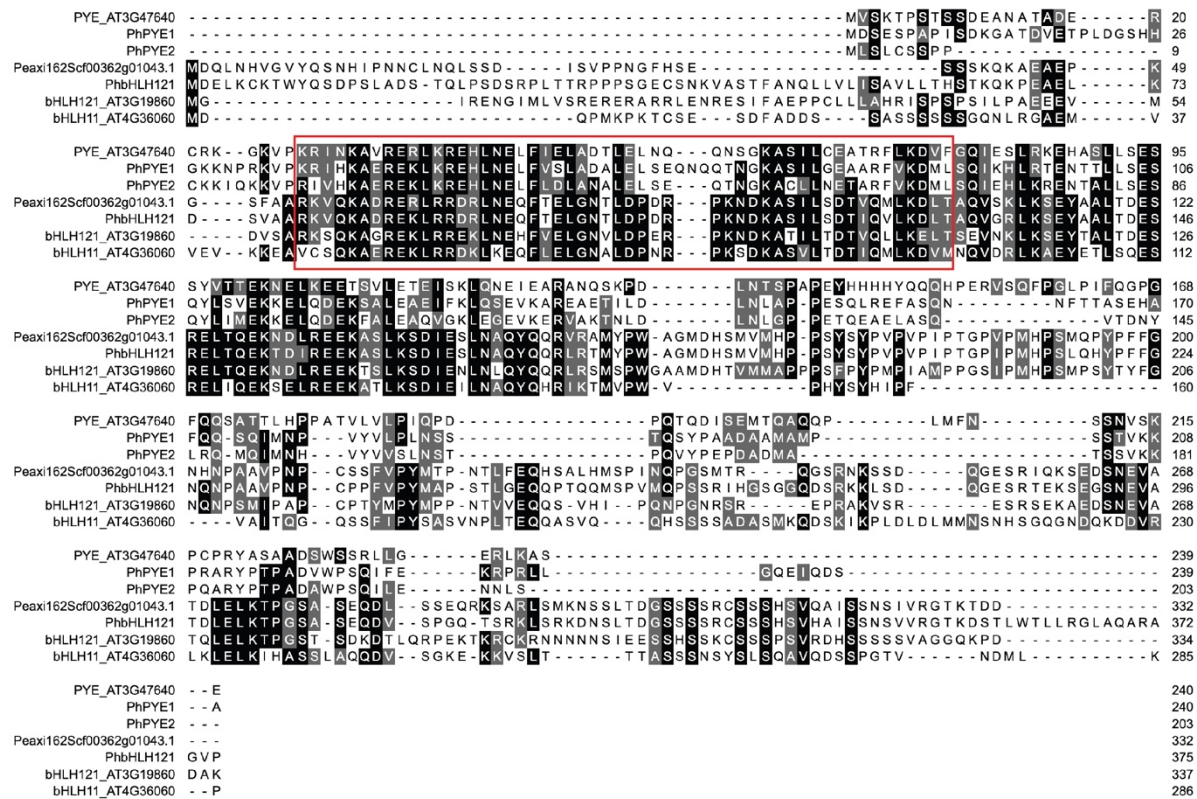

**Figure S1.** Multiple sequence alignment of PhbHLH IVb proteins. Red box indicates the conserved bHLH domain.

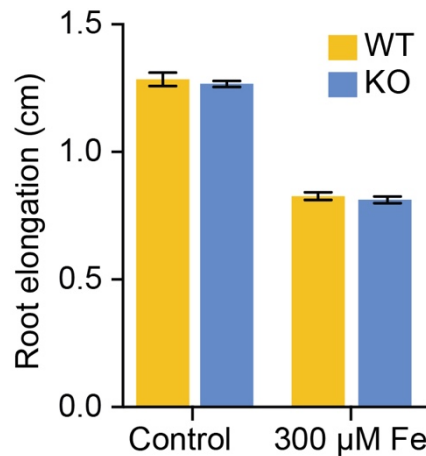

**Figure S2.** Root elongation of 7-day-old petunia seedlings exposed to medium supplied with excess Fe in the last 2 days. Values are means  $\pm$  SD (n=20).

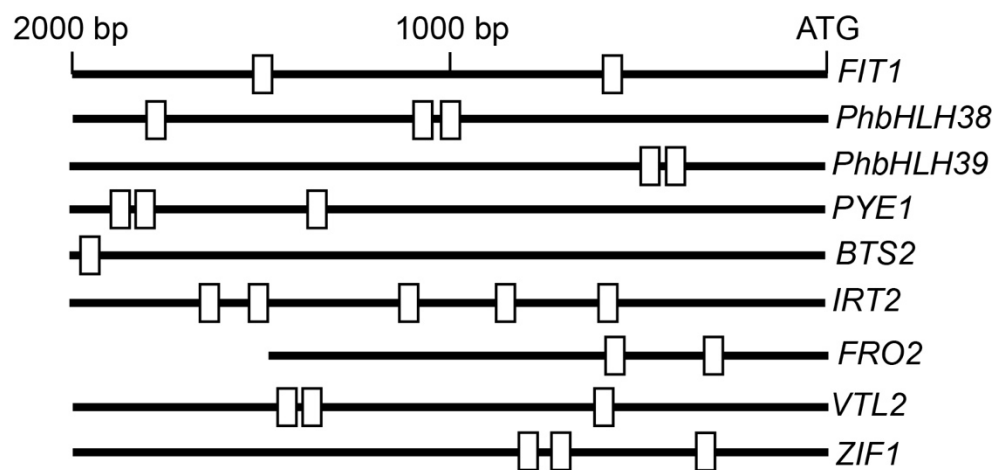

**Figure S3.** Promoter structure diagrams for several genes involved in Fe homeostasis. White boxes indicate G-box.

**Table S1.** List of primers used for real-time PCR in this study

| Primers | Gene                          | Sequences (5'-3')        |
|---------|-------------------------------|--------------------------|
| 062K    | <i>EF1<math>\alpha</math></i> | ATCCTGGTCAAATTGGAAACGG   |
| 063K    | <i>EF1<math>\alpha</math></i> | CAGATCGCCTGTCAATCTTGG    |
| 0656    | <i>PhbHLH121</i>              | GCCTGAATGAACAGTTCACCTG   |
| 0657    | <i>PhbHLH121</i>              | CAGCACTTGAATGGTATCACTG   |
| 3157    | <i>FIT-like1</i>              | GGTATTACGTGAAACTAGTCTG   |
| 3158    | <i>FIT-like1</i>              | ATGATCTGCAGAAGTAGCTAAG   |
| 0574    | <i>bHLH038</i>                | AATAATTCATCTCCTCCATCTCAC |
| 0575    | <i>bHLH038</i>                | CTGCGCTCACTTGC GTTATG    |
| 0534    | <i>bHLH039</i>                | AATGTTCTGTCTTGAGATTGTTTC |
| 0682    | <i>bHLH039</i>                | TCTCAAGTACATACCCGAGTTAC  |
| 0646    | <i>BSTL</i>                   | GGAGCTTGTTGCTGTAATAAGAC  |
| 0647    | <i>BSTL</i>                   | GAAATACATGCCTCATTAGCAAG  |
| 0640    | <i>BTS1</i>                   | TCGCTGGATAGCTGCTCAG      |
| 0641    | <i>BTS1</i>                   | AACTTGCTTGTCTGGATCACG    |
| 0578    | <i>BTS2</i>                   | GAGCTGGCAGCTTCAGTTC      |
| 0579    | <i>BTS2</i>                   | CTGTGCAGCAACCAGTGACACTAG |
| 0650    | <i>PYE1</i>                   | GAGTAGCTAAGACTAATCTTGAC  |
| 0651    | <i>PYE1</i>                   | CATCTGCCTGAGATAGTTATCTG  |
| 0652    | <i>PYE2</i>                   | CTATCTGAGCAGAATCAGCAG    |
| 0653    | <i>PYE2</i>                   | TCCTCAGATGCTTGATCTGAG    |
| 0856    | <i>IRT2</i>                   | CTGGCTTCATGCATGTCCTACC   |
| 0857    | <i>IRT2</i>                   | CGTAACAACAGCAGACAACATTGC |
| 0938    | <i>IRT1</i>                   | GGAATCATTGTTCACTCAATAGTG |
| 0939    | <i>IRT1</i>                   | TGCCATTATTGCCTTCTTCCAG   |
| 0525    | <i>FRO2</i>                   | GCCAATTACTCCAATTCTTGGA   |
| 0526    | <i>FRO2</i>                   | CGATTGGGTAGATGTAATAACTAG |
| 3169    | <i>FRO1</i>                   | CGTAAGAACTATATGGTTCAAGC  |
| 3170    | <i>FRO1</i>                   | GAAGGAAGATGATATGATAGCAC  |
| 1106    | <i>FRO3</i>                   | CACAACCTGAGCTACAAATTGAG  |
| 1107    | <i>FRO3</i>                   | GGTTTGAACCATATAGTCGTC    |
| 3155    | <i>FRO4</i>                   | AGAGCAGCTCTCAATATGCTG    |
| 3156    | <i>FRO4</i>                   | CATGTCATTGTTCTTAATCTGCAC |
| 3167    | <i>FRO5</i>                   | TGACAGTGTCACTTCATGCTG    |
| 3168    | <i>FRO5</i>                   | GAGCTCAATCCATGTCACTATC   |
| 0612    | <i>NAS1</i>                   | GCGTTGGTTGGTATGGATATC    |

|      |             |                         |
|------|-------------|-------------------------|
| 0613 | <i>NAS1</i> | GCACCATGTGCACTCCTTAG    |
| 3145 | <i>NAS2</i> | GAGCAACCCTGATGCTCAG     |
| 3146 | <i>NAS2</i> | CCTCATCTATTGGATGATACACC |
| 3163 | <i>FER1</i> | ATGGTACCTATTACTCCACAAAC |
| 3164 | <i>FER1</i> | TGTTGTCCATCAAGATTGATCTG |
| 0664 | <i>FER2</i> | GAGGACATGCTGAGAAATTGATG |
| 0665 | <i>FER2</i> | ACAAACTTACCATACAACGCATC |
| 0622 | <i>FER3</i> | CTTGTAACCTACTGTTCCACAAG |
| 0623 | <i>FER3</i> | AAACATCGCGTGATAAACATACG |
| 3147 | <i>VTL2</i> | AGATGATGTAGAAGATGAGAAG  |
| 3148 | <i>VTL2</i> | CAGCCAATAATGGCACCATTG   |
| 0632 | <i>YSL1</i> | GTTCTCTCCCAATGGCTATG    |
| 0633 | <i>YSL1</i> | ATCAAAGTAGCCTTCCTGCTG   |
| 0636 | <i>YSL2</i> | CACAGCCATTGCCATAGGCAG   |
| 0637 | <i>YSL2</i> | TGCTTATGGTTCTGGTTTACTG  |
| 0602 | <i>NEET</i> | AGCTAAAGTTGTGGACTCTGTTG |
| 0603 | <i>NEET</i> | TCACATGGCTTCCATCACATAG  |
| 3149 | <i>ZIF1</i> | GGGTCAACCCTCTTGTGGC     |
| 3150 | <i>ZIF1</i> | CTGGTCCACTGCTCTGTTCTG   |
| 3151 | <i>ZIF2</i> | GTTGGTGAAGTACTATCGATCTC |
| 3152 | <i>ZIF2</i> | CAACTCGAGCAGTGATGATAG   |
| 3153 | <i>ZIF3</i> | GCATTAGCCGCAACAGTAATC   |
| 3154 | <i>ZIF3</i> | TCACGGAGATCACTGCGATC    |

---

**Table S2.** List of primers used for plasmids construction

| Primers                  | Sequences (5'-3')                              |
|--------------------------|------------------------------------------------|
| <b>35S:PhbHLH121-GFP</b> |                                                |
| 0754                     | gagaacacgggggactctagaATGGATGAATTAAAGTGCAAG     |
| 0761                     | cgcccttgctcaccatggatccAGGGACGCCAGCTCTAGCCTG    |
| <b>35S:GFP-PhbHLH121</b> |                                                |
| 0898                     | GGACGAGCTGTACAAGGGTCTAGAcATGGATGAATTAAAGTGCAAG |
| 0899                     | GAGCTCTATCGATCAATCAGGATCCTTAAGGGACGCCAGCTCTAGC |
| <b>35S:PhbHLH34-RFP</b>  |                                                |
| 1005                     | gagaacacgggggactctagaATGGTTTCACCGGAGAACACTA    |
| 1006                     | ctcgaggaggccatggatccAGCAACTGGAGGGCGGAGCAC      |
| <b>35S:PhbHLH104-RFP</b> |                                                |
| 1014                     | gagaacacgggggactctagaATGGCGGCGGCAGAAGAAGATG    |
| 1015                     | ctcgaggaggccatggatccAGCAACTGGGGGACGGAGAG       |
| <b>35S:PhbHLH105-RFP</b> |                                                |
| 1009                     | gagaacacgggggactctagaATGAATCAATTGGATTCAATTC    |
| 1010                     | ctcgaggaggccatggatccAGCAGCAGGAGGCCTGAGCTC      |
| <b>35S:PhbHLH115-RFP</b> |                                                |
| 1019                     | gagaacacgggggactctagaATGGTTTCACCGGAGAACACTAA   |
| 1020                     | ctcgaggaggccatggatccAGCAACTGGAGGGCGGAGCAC      |
| <b>AD-PhbHLH34</b>       |                                                |
| 0984                     | CCATGGAGGCCAGTGAATTCATGGTTTCACCGGAGAACACTA     |
| 0985                     | CGATTCATCTGCAGCTCGAGTTAAGCAACTGGAGGGCGGAG      |
| <b>AD-PhbHLH104</b>      |                                                |
| 1012                     | ccatggaggccagtgaattcATGGCGGCGGCAGAAGAAGATG     |
| 1013                     | cgattcatctgcagctcgagTTAAGCAACTGGGGGACGGAG      |
| <b>AD-PhbHLH105</b>      |                                                |
| 1007                     | CCATGGAGGCCAGTGAATTCATGAATCAATTGGATTCAATTC     |
| 1008                     | CGATTCATCTGCAGCTCGAGTCAAGCAGCAGGAGGCCTGAG      |
| <b>AD-PhbHLH115</b>      |                                                |
| 1021                     | ccatggaggccagtgaattcATGGTTTCACCGGAGAACACTAA    |
| 1022                     | cgattcatctgcagctcgagTTAAGCAACTGGAGGGCGGAGC     |
| <b>BD-PhbHLH121</b>      |                                                |
| 0974                     | ATCTCAGAGGAGGACCTGCATATGATGGATGAATTAAAGTGCAAG  |
| 0975                     | TCGACGGATCCCCGGAATTCTTAAGGGACGCCAGCTCTAGC      |
| <b>BD-PhbHLH121m</b>     |                                                |
| 0974                     | ATCTCAGAGGAGGACCTGCATATGATGGATGAATTAAAGTGCAAG  |
| 0979                     | TCGACGGATCCCCGGAATTCTTACAATTTCTCCCGATCGGCCTTC  |

*proGbox:HIS*

1049        aattcCACGTGCACGTGCACGTGgagct

1050        cCACGTGCACGTGCACGTGg

*proPhbHLH039:LUC*

3141        gtcgacggtatcgataagcttTGGTTAGGGTTTCTAAATGTGG

3142        ccgctctagaactagtgatccTTGTTAAACAGTGTGTCATGTC

---
